# Supplementary material
Source: Research Square preprint supplement (doi:10.21203/rs.3.rs-10039585/v1)
Supplement: Supplementary file 1 [file 43642bcee042092d60108bda.pdf]

Supplementary Information for

# **Deterministic Out-of-Plane Spin Polarization Enabled by Altermagnetic Filtering of Critical Spin Fluctuations**

Qian Chen<sup>1,2,5</sup>, Xiaoqian Zhang<sup>1,5</sup>, Wenting Lin<sup>1</sup>, Wei Jiang<sup>1</sup>, Tieyang Zhao<sup>2</sup>, Zhenyi Zheng<sup>2</sup>, Cheng Zhang<sup>2</sup>, Zhacong Huang<sup>1</sup>, Lin Miao<sup>1</sup>, Ke Xia<sup>1</sup>, Ya Zhai<sup>1</sup>, Jingsheng Chen<sup>2,3,4</sup>

<sup>1</sup> Key Laboratory of Quantum Materials and Devices of Ministry of Education, School of Physics, Southeast University, Nanjing, 211189, China

<sup>2</sup> Department of Materials Science and Engineering, National University of Singapore, Singapore, Singapore

<sup>3</sup> Suzhou Research Institute, National University of Singapore, Suzhou, China.

<sup>4</sup> Chongqing Research Institute, National University of Singapore, Chongqing, China. 7

<sup>5</sup> These authors contributed equally: Qian Chen, Xiaoqian Zhang

Email: kexia@seu.edu.cn, yazhai@seu.edu.cn, msecj@nus.edu.sg

## **Content**

**S1 Structure and Magnetic Characterizations**

**S2 Derivation of the Angular Dependence of Third-Order Hall Resistance**

**S3 Thermal Effects on Third-Order Magnetoresistances**

**S4 Extraction of  $R_A$  and  $R_P$  from First-Harmonic Hall Resistances**

**S5 Longitudinal magnetoresistance measured in the  $xy$ -Plane**

**S6 Third-Harmonic Hall Response of the Fe/Te Control Sample**

**S7 Third-Harmonic Hall Response of the CrTe<sub>2</sub>/Fe/Te Control Sample**

**S8 Comparisons of Spin Torque–Equivalent Fields in Conventional Linear Systems**

**S9 Current-Induced Temperature Variation in the Device**

**S10 Second-Harmonic Responses and Their Dependence on the Magnetic Field**

**S11 Third-Harmonic Hall Resistances Measured in the  $yz$ -Plane**

## S1 Structure and Magnetic Characterizations

As shown in Fig. S1a, the RHEED patterns of both CrTe<sub>2</sub> and CrSb films display stripe-like features with a clear “1 × 1” periodicity, indicating the successful formation of two-dimensional crystalline layers. When a monolayer of CrSb is deposited atop CrTe<sub>2</sub>, the first-order diffraction spots shift closer together, reflecting the slightly larger in-plane lattice constant of CrSb relative to CrTe<sub>2</sub>. From these diffraction data, the in-plane lattice constants are estimated to be 4.07 Å for CrSb and 3.91 Å for CrTe<sub>2</sub>.

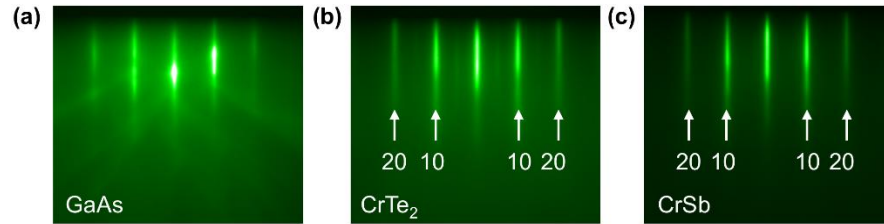

**FIG. S1** In-situ RHEED patterns of CrTe<sub>2</sub> and CrSb films on GaAs (0001).

The temperature-dependent magnetization of CrTe<sub>2</sub> is shown in Fig. S2, revealing a Curie temperature of approximately 305 K.

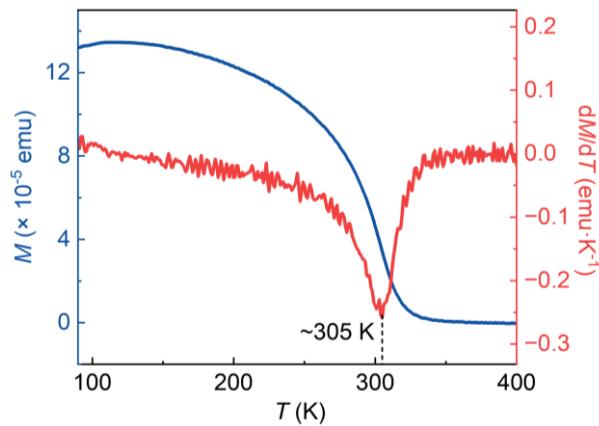

**FIG. S2** Temperature dependence of the magnetization of CrTe<sub>2</sub>.

The magnetic hysteresis loop of the Fe film is presented in Fig. S3, demonstrating that an in-plane magnetic field of 1000 Oe is adequate to achieve its saturation.

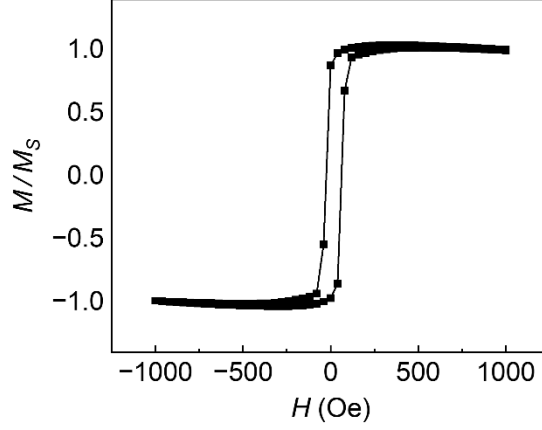

FIG. S3 Room-temperature magnetic hysteresis loop of the Fe film.

## S2 Derivation of the Angular Dependence of Third-Order Hall Resistance

With an alternating current  $\overline{I_{ac}} = I_0 \sin(\omega t) \hat{x}$ , the Hall voltage can be expressed as

$$V_{xy} = R_{xy} I_0 \sin \omega t$$

$R_{xy}$  is the Hall resistance consists of mainly the AHE and PHE,

$$\begin{aligned} R_{xy} &= R_A m_z + R_P^0 m_x m_y \\ &= R_A \cos \theta + R_P \sin 2\varphi \sin^2 \theta \end{aligned}$$

$R_A$  and  $R_P$  are AHE and PHE coefficients respectively. After Taylor expansion of  $\Delta\theta$  and  $\Delta\varphi$  related terms to the second-order small quantities, the Hall voltage is expressed as:

$$\begin{aligned} V_y \approx & \left[ R_A \left( \cos \theta - \sin \theta \cdot \Delta\theta - \frac{\cos \theta}{2} \cdot \Delta\theta^2 \right) \right. \\ & + R_P (\sin 2\varphi + 2\cos 2\varphi \cdot \Delta\varphi - 2\sin 2\varphi \cdot \Delta\varphi^2) (\sin^2 \theta + \sin 2\theta \cdot \Delta\theta \\ & \left. + \cos 2\theta \cdot \Delta\theta^2 \right] \cdot I_0 \sin \omega t \end{aligned}$$

In  $xy$ -plane, it can be simplified as

$$\begin{aligned} V_y &\approx [-R_A \cdot \Delta\theta + R_P (\sin 2\varphi + 2\cos 2\varphi \cdot \Delta\varphi - 2\sin 2\varphi \cdot \Delta\varphi^2) (1 - \Delta\theta^2)] \cdot I_0 \sin \omega t \\ &\approx [-R_A \cdot \Delta\theta + R_P \sin 2\varphi + 2R_P \cos 2\varphi \cdot \Delta\varphi - 2R_P \sin 2\varphi \cdot \Delta\varphi^2 - R_P \cdot \sin 2\varphi \cdot \Delta\theta^2] \cdot I_0 \sin \omega t \end{aligned}$$

Here,  $\Delta\theta$  and  $\Delta\varphi$  can be obtained by solving the equilibrium equations under the effective field induced by the spin torque, and are given by<sup>1</sup>

$$\begin{aligned} \Delta\theta &= \frac{\cos \theta (\Delta H_x \cos \varphi + \Delta H_y \sin \varphi) - \Delta H_z \sin \theta}{H_k \cos 2\theta + H} \\ \Delta\varphi &= \frac{-\Delta H_x \sin \varphi + \Delta H_y \cos \varphi}{H} \end{aligned}$$

The effective field  $\overline{\Delta H}$  originates from the spin torque. For nonlinear systems, it can be expressed as

$$\overrightarrow{H_{FL}} = (H_{FL} \sin \omega t + H_{NLFL} \sin^2 \omega t) \cdot \hat{\sigma}$$

$$\overrightarrow{H_{DL}} = (H_{DL} \sin \omega t + H_{DLFL} \sin^2 \omega t) \cdot (\hat{m} \times \hat{\sigma})$$

where  $H_{DL(FL)}$  and  $H_{NLDL(NLFL)}$  denote the linear and nonlinear damping-like (field-like) spin torque effective fields, respectively.  $\hat{\sigma} = (a, b, c)$  denotes the spin polarization direction. The total effective field is then given by

$$\begin{aligned} \overrightarrow{\Delta H} &= \overrightarrow{H_{FL}} + \overrightarrow{H_{DL}} \\ &= \begin{pmatrix} (H_{DL} \sin \omega t + H'_{DL} \sin^2 \omega t)(\sin \varphi \sin \theta \cdot c - \cos \theta \cdot b) + (H_{FL} \sin \omega t + H'_{FL} \sin^2 \omega t) \cdot a \\ (H_{DL} \sin \omega t + H'_{DL} \sin^2 \omega t)(\cos \theta \cdot a - \cos \varphi \sin \theta \cdot c) + (H_{FL} \sin \omega t + H'_{FL} \sin^2 \omega t) \cdot b \\ (H_{DL} \sin \omega t + H'_{DL} \sin^2 \omega t)(\cos \varphi \sin \theta \cdot b - \sin \varphi \sin \theta \cdot a) + (H_{FL} \sin \omega t + H'_{FL} \sin^2 \omega t) \cdot c \end{pmatrix} \end{aligned}$$

For  $\hat{\sigma} = (1,0,0)$ , we have

$$\begin{aligned} V_y \approx & \left[ \frac{R_A}{H_k - H} (H_{DL} \sin \omega t + H_{NLDL} \sin^2 \omega t) \sin \varphi + R_p \sin 2\varphi \right. \\ & - \frac{2R_p \cos 2\varphi}{H} (H_{FL} \sin \omega t + H_{NLFL} \sin^2 \omega t) \sin \varphi \\ & - \frac{2R_p \sin 2\varphi}{H^2} (H_{FL} \sin \omega t + H_{NLFL} \sin^2 \omega t)^2 \sin^2 \varphi \\ & \left. - \frac{R_p \cdot \sin 2\varphi}{(-H_k + H)^2} (H_{DL} \sin \omega t + H_{NLDL} \sin^2 \omega t)^2 \sin^2 \varphi \right] \cdot I_0 \sin \omega t \end{aligned}$$

Therefore,

$$\begin{aligned} R_y^{3\omega} = \frac{V_y^{3\omega}}{I_0} \approx & -\frac{1}{4} \cdot \frac{R_A H_{NLDL}}{H_k - H} \sin \varphi + \frac{1}{2} \cdot \frac{R_p H_{NLFL}}{H} \cos 2\varphi \sin \varphi + \frac{1}{4} \\ & \cdot \left[ \frac{2R_p H_{FL}^2}{H^2} + \frac{R_p H_{NLDL}^2}{(-H_k + H)^2} \right] \sin 2\varphi \sin^2 \varphi \end{aligned}$$

For  $\hat{\sigma} = (0,1,0)$ , we have

$$\begin{aligned} V_y \approx & \left[ \frac{R_A}{-H_k + H} (H_{DL} \sin \omega t + H_{NLDL} \sin^2 \omega t) \cos \varphi + R_p \sin 2\varphi \right. \\ & + \frac{2R_p}{H} (H_{FL} \sin \omega t + H_{NLFL} \sin^2 \omega t) \cos 2\varphi \cos \varphi \\ & - \frac{2R_p}{H^2} (H_{FL} \sin \omega t + H_{NLFL} \sin^2 \omega t)^2 \sin 2\varphi \cos^2 \varphi \\ & \left. - \frac{R_p (H_{DL} \sin \omega t + H_{NLDL} \sin^2 \omega t)^2}{(-H_k + H)^2} \cdot \sin 2\varphi \cos^2 \varphi \right] \cdot I_0 \sin \omega t \end{aligned}$$

Therefore

$$\begin{aligned} R_y^{3\omega} \approx & -\frac{1}{4} \cdot \frac{R_A H_{NLDL}}{-H_k + H} \cos \varphi - \frac{1}{2} \cdot \frac{R_p H_{NLFL}}{H} \cos 2\varphi \cos \varphi + \frac{1}{4} \\ & \cdot \left[ \frac{2R_p H_{FL}^2}{H^2} + \frac{R_p H_{DL}^2}{(-H_k + H)^2} \right] \sin 2\varphi \cos^2 \varphi \end{aligned}$$

For  $\hat{\sigma} = (0,0,1)$ , we have

$$V_y \approx \left[ \frac{R_A}{-H_k + H} (H_{FL} \sin \omega t + H_{NLFL} \sin^2 \omega t) + R_P \sin 2\varphi \right. \\ \left. - \frac{2R_P}{H} (H_{DL} \sin \omega t + H_{NLDL} \sin^2 \omega t) \cos 2\varphi \right. \\ \left. - \frac{2R_P}{H^2} (H_{DL} \sin \omega t + H_{NLDL} \sin^2 \omega t)^2 \sin 2\varphi \right. \\ \left. - \frac{R_P (H_{FL} \sin \omega t + H_{NLFL} \sin^2 \omega t)^2}{(H_k - H)^2} \cdot \sin 2\varphi \right] \cdot I_0 \sin \omega t$$

Therefore

$$R_y^{3\omega} \approx -\frac{1}{4} \cdot \frac{R_A H_{NLFL}}{-H_k + H} + \frac{1}{2} \cdot \frac{R_P H_{NLDL}}{H} \cos 2\varphi + \frac{1}{4} \cdot \left[ \frac{2R_P H_{DL}^2}{H^2} + \frac{R_P H_{FL}^2}{(H_k - H)^2} \right] \sin 2\varphi$$

The derivation of the longitudinal third-order magnetoresistance follows a similar procedure.

### S3 Thermal Effects on Third-Order Magnetoresistances

The thermal effect is mainly manifested as the influence of the Spin Seebeck Effect (SSE) and Spin Nernst Effect (SNE) on the second-order resistance being transmitted to the third order. The second-order resistance terms generated by SSE and SNE can be expressed as:

$$R_x^{2\omega} = k_{\nabla T} \frac{l}{w} I_0 \sin \varphi$$

$$R_y^{2\omega} = k_{\nabla T} I_0 \cos \varphi$$

$k_{\nabla T}$  is the thermal resistance coefficient related to SSE and SNE, and  $\frac{l}{w}$  denotes the length-to-width ratio of the core device.

$$V_y = k_{\nabla T} I_0 \cos(\varphi + \Delta\varphi) \cdot I_0 \cos(2\omega t) = k_{\nabla T} I_0^2 \cos(\varphi + \Delta\varphi) - 2k_{\nabla T} I_0^2 \cos(\varphi + \Delta\varphi) \sin^2(\omega t)$$

Which can be further simplified as

$$V_y = k_{\nabla T} I_0^2 \left( \cos \varphi - \sin \varphi \cdot \Delta\varphi - \frac{\cos \varphi}{2} \cdot \Delta\varphi^2 \right) \\ - 2k_{\nabla T} I_0^2 \left( \cos \varphi - \sin \varphi \cdot \Delta\varphi - \frac{\cos \varphi}{2} \cdot \Delta\varphi^2 \right) \sin^2(\omega t)$$

Extracted thermal effects on the third harmonic responses are summarized as Table S1.

Table S1 Thermal Effects on the Third-Harmonic Signals

|                  | $R_y^{3\omega}$                                                                                                                                     | $R_x^{3\omega}$                                                                                                                                     |
|------------------|-----------------------------------------------------------------------------------------------------------------------------------------------------|-----------------------------------------------------------------------------------------------------------------------------------------------------|
| $\hat{\sigma}_x$ | $\frac{k_{\nabla T} I_0 \cdot H_{FL}}{2H} \sin^2 \varphi$ $+ \frac{k_{\nabla T} I_0 \cdot H_{FL} \cdot H_{NLFL}}{4H^2} \cos \varphi \sin^2 \varphi$ | $-k_{\nabla T} \frac{l H_{FL}}{2wH} I_0 \cos \varphi \sin \varphi$ $+ k_{\nabla T} \frac{l \cdot H_{FL} \cdot H_{NLFL}}{4wH^2} I_0 \sin^3 \varphi$  |
| $\hat{\sigma}_y$ | $- \frac{k_{\nabla T} I_0 \cdot H_{FL}}{2H} \sin \varphi \cos \varphi$ $+ \frac{k_{\nabla T} I_0 \cdot H_{FL} \cdot H_{NLFL}}{4H^2} \cos^3 \varphi$ | $k_{\nabla T} \frac{l H_{FL}}{2wH} I_0 \cos^2 \varphi$ $+ k_{\nabla T} \frac{l \cdot H_{FL} \cdot H_{NLFL}}{4wH^2} I_0 \sin \varphi \cos^2 \varphi$ |
| $\hat{\sigma}_z$ | $\frac{k_{\nabla T} I_0 \cdot H_{DL}}{2H} \sin \varphi$ $+ \frac{k_{\nabla T} I_0 \cdot H_{DL} \cdot H_{NLDL}}{4H^2} \cos \varphi$                  | $-k_{\nabla T} \frac{l \cdot H_{DL}}{2wH} I_0 \cos \varphi$ $+ k_{\nabla T} \frac{l \cdot H_{DL} \cdot H_{NLDL}}{4wH^2} I_0 \sin \varphi$           |

#### S4 Extraction of $R_A$ and $R_P$ from First-Harmonic Hall Resistances

The parameters  $R_P$  and  $R_A$  can be independently extracted by fitting the angular dependence of the first-harmonic Hall resistance measured in the  $xy$ - and  $yz$ -planes, respectively.

As shown in Fig. S4(a), in the  $xy$ -plane configuration, the first-harmonic Hall resistance  $R_{xy}^{1\omega}$  follows

$$R_{xy}^{1\omega} = R_P \sin 2\varphi$$

from which a fitting yield  $R_P = 52.61 \pm 0.80 \text{ m}\Omega$ .

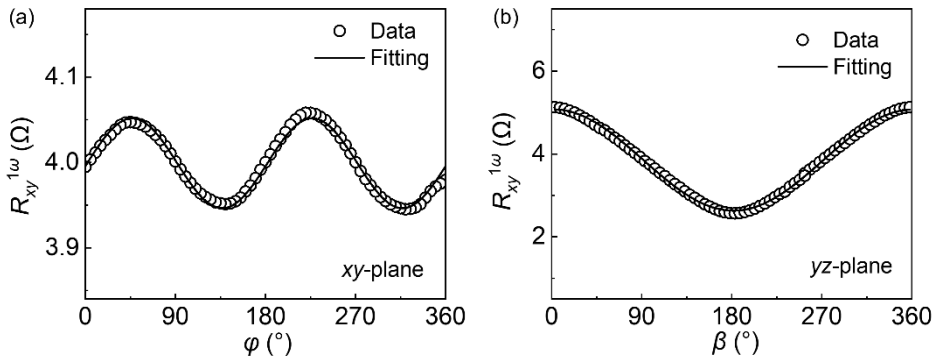

**FIG. S4** (a) Angular dependence of the first-harmonic Hall resistance  $R_{xy}^{1\omega}$  measured with the magnetic field rotated in the  $xy$ -plane. (b) Angular dependence of  $R_{xy}^{1\omega}$  measured with the magnetic field rotated in the  $yz$ -plane.

As shown in Fig. S4(b), when the magnetic field is rotated in the  $yz$ -plane, the angular dependence of  $R_{xy}^{1\omega}$  can be described by

$$R_{xy}^{1\omega} = R_A \cos \theta$$

Accordingly, the fitting yields  $R_A = 1219.17 \pm 5.03 \text{ m}\Omega$ .

### S5 Longitudinal magnetoresistance measured in the $xy$ -Plane

The first- and third-harmonic longitudinal magnetoresistance measured in the  $xy$ -plane are shown in Fig. S5(a) and (b), respectively. We attempted to fit the third-harmonic longitudinal resistance  $R_x^{3\omega}$  using the angular dependence expressions summarized in Table 1 and Table S1. However, it was found that the contributions arising from nonlinear spin-orbit torques cannot be unambiguously separated from those originating from thermoelectric effects in this configuration.

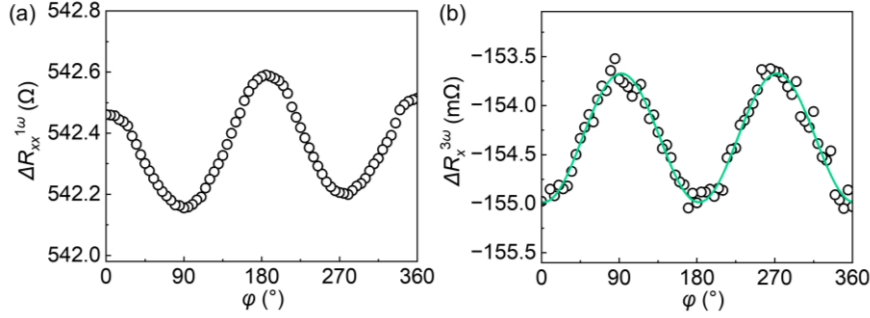

**FIG. S5** (a) First-harmonic longitudinal magnetoresistance  $R_{xx}^{1\omega}$  measured with the magnetic field rotated in the  $xy$ -plane. (b) Third-harmonic longitudinal magnetoresistance  $R_x^{3\omega}$  measured under the same rotation configuration. The solid line shows the fitting curve with the coexistence of nonlinear spin-orbit torque and thermoelectric contributions.

### S6 Third-Harmonic Hall Response of the Fe/Te Control Sample

Third-harmonic Hall measurements were performed on the control sample consisting of an 8-nm Fe layer capped with Te, and the results are shown in Fig. S6. At current amplitudes comparable to those applied to the CrTe<sub>2</sub>/CrSb/Fe samples, the third-harmonic Hall resistance is barely detectable. Upon further increasing the current up to 2 mA, a finite  $R_y^{3\omega}$  signal emerges, which is dominated by thermoelectric effects. Even at higher current levels, no discernible contribution attributable to nonlinear spin-orbit torques can be identified.

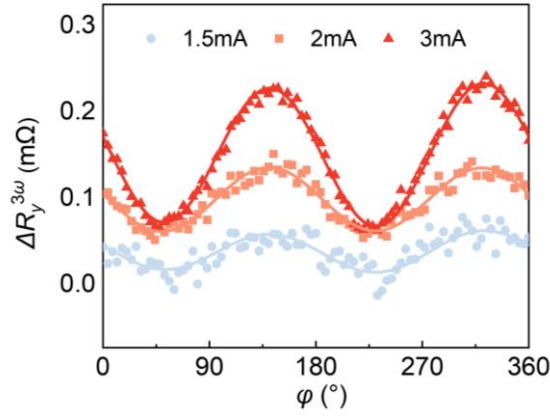

**FIG. S6** Third-harmonic Hall resistance  $R_y^{3\omega}$  of the Fe/Te control sample measured under various applied current amplitudes. The data indicate that the observed  $R_y^{3\omega}$  signal at higher currents is dominated by thermoelectric effects.

### S7 Third-Harmonic Hall Response of the CrTe<sub>2</sub>/Fe/Te Control Sample

Third-harmonic Hall measurements were also carried out on the CrTe<sub>2</sub>/Fe control sample capped with Te, and the results are shown in Fig. S7(a). Measurements were performed for different crystallographic orientations. At current amplitudes comparable to those applied to the CrTe<sub>2</sub>/CrSb/Fe samples, the third-harmonic Hall signal is nearly absent. As the current is further increased, a finite  $R_y^{3\omega}$  signal emerges, which is dominated by thermoelectric effects. Similarly, no discernible contribution from nonlinear spin-orbit torques is observed, as shown in Fig. S7(b) and Fig. S7(c).

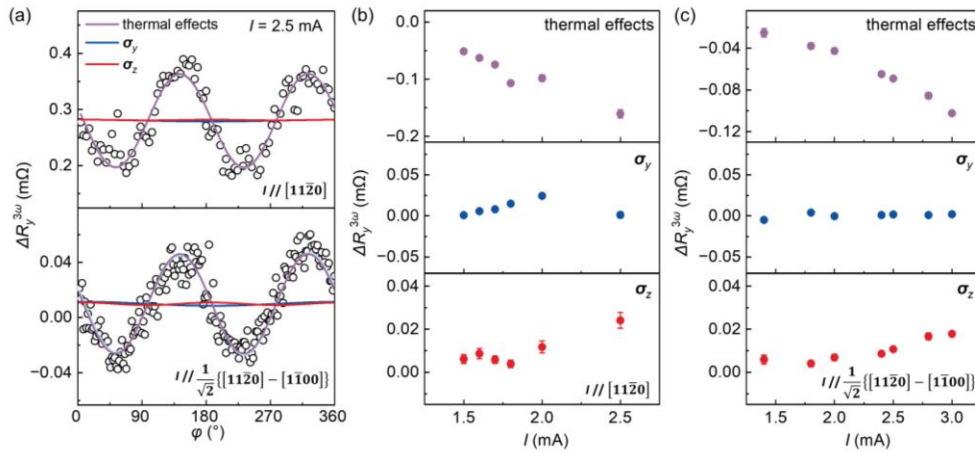

**FIG. S7** (a) Third-harmonic Hall resistance  $R_y^{3\omega}$  of the CrTe<sub>2</sub>/Fe/Te control sample measured at 2.5 mA. (b,c) Extracted  $R_y^{3\omega}$  measured along two different crystallographic orientations, decomposed into contributions from different sources.

## S8 Comparisons of Spin Torque–Equivalent Fields in Conventional Linear Systems

Table S1 Spin torque–equivalent fields in linear systems

| Structures                                             | $H_{DL,y}$ ( $10^{-10}$ Oe·A <sup>-1</sup> m <sup>2</sup> ) | $H_{DL,z}$ ( $10^{-10}$ Oe·A <sup>-1</sup> m <sup>2</sup> ) | Ref.               |
|--------------------------------------------------------|-------------------------------------------------------------|-------------------------------------------------------------|--------------------|
| Pt/Co                                                  | 1.7                                                         | -                                                           | Ref. <sup>2</sup>  |
| Pt/[Co/Ni] <sub>2</sub>                                | 4                                                           | -                                                           | Ref. <sup>3</sup>  |
| Pt/Co                                                  | 6.9                                                         | -                                                           | Ref. <sup>4</sup>  |
| Pt/LSMO                                                | 2.5                                                         | -                                                           | Ref. <sup>5</sup>  |
| Ta/CoFeB                                               | 2                                                           | -                                                           | Ref. <sup>6</sup>  |
| Ta/CoFeB                                               | 4                                                           | -                                                           | Ref. <sup>7</sup>  |
| W/CoFeB                                                | 3                                                           | -                                                           | Ref. <sup>8</sup>  |
| W/CoFeB                                                | 1.25                                                        | -                                                           | Ref. <sup>9</sup>  |
| CuPt/CoPt                                              | 2.2                                                         | 0.6                                                         | Ref. <sup>10</sup> |
| CuPt/CoPt                                              | 0.9                                                         | 0.4                                                         | Ref. <sup>11</sup> |
| Pt/Co/Ta                                               | 5                                                           | 0.2                                                         | Ref. <sup>12</sup> |
| WTe <sub>2</sub> /Fe <sub>2.78</sub> GeTe <sub>2</sub> | -                                                           | 8                                                           | Ref. <sup>13</sup> |

## S9 Current-Induced Temperature Variation in the Device

We quantified the temperature rise of the device induced by the applied current. First, at 300 K, the device resistance was measured as a function of current within the experimental range, as shown in Fig. S8(a). In parallel, the temperature dependence of the device resistance was calibrated using a small probing current of 40  $\mu$ A ( $\sim 2.4 \times 10^8$  A/m<sup>2</sup>), as shown in Fig. S8(b). By correlating the resistance values obtained at different currents with the temperature calibration curve, the actual device temperature as a function of applied current was determined, as presented in Fig. S8(c). These measurements indicate that, under the experimental current conditions, the device temperature increases by no more than  $\sim 2$  K.

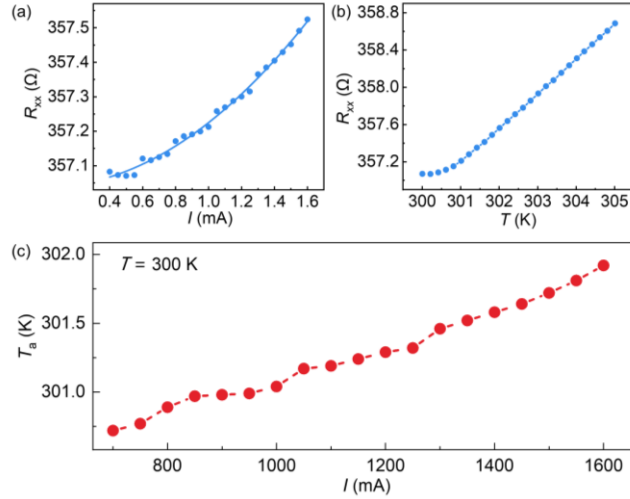

**FIG. S8** (a) Measured device resistance as a function of applied current at 300 K within the experimental range used in this study. (b) Temperature dependence of the device resistance. (c) Estimated actual device temperature as a function of applied current

### S10 Second-Harmonic Responses and Their Dependence on the Magnetic Field

Second-harmonic Hall and longitudinal resistance measurements were performed on the CrTe<sub>2</sub>/CrSb/Fe sample. The angular dependencies of  $R_y^{2\omega}$  and  $R_x^{2\omega}$  are shown in Fig. S9(a) and (c), respectively, while their variations with the applied magnetic field are presented in Fig. S9(b) and (d). Both  $R_y^{2\omega}$  and  $R_x^{2\omega}$  increase in amplitude with increasing magnetic field, indicating that they cannot be attributed to linear spin-current-induced spin-orbit torques, but instead arise from nonlinear effects<sup>14,15</sup>.

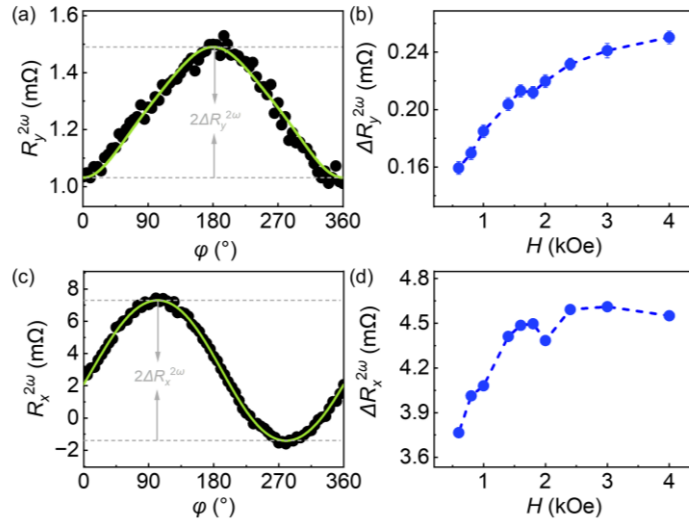

**FIG. S9** (a,c) Angular dependence of  $R_y^{2\omega}$  and  $R_x^{2\omega}$ , respectively. (b,d) Magnetic-field dependence of the corresponding second-harmonic signals of  $R_y^{2\omega}$  and  $R_x^{2\omega}$ , respectively.

## S11 Third-Harmonic Hall Resistances Measured in the $yz$ -Plane

The first-, second-, and third-harmonic Hall and longitudinal resistances of the CrTe<sub>2</sub>/CrSb/Fe sample measured with the magnetic field rotated in the  $yz$ -plane are shown in Fig. S11. A clear third-harmonic magnetoresistance response is also observed in this measurement configuration.

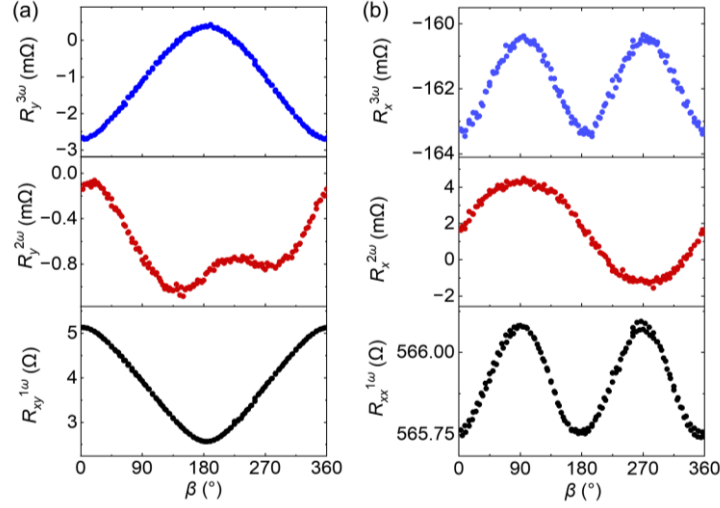

**FIG. S10** First-, second-, and third-harmonic (a) Hall and (b) longitudinal resistances measured with the magnetic field rotated in the  $yz$ -plane.

## References

- 1 Hayashi, M., Kim, J., Yamanouchi, M. & Ohno, H. Quantitative characterization of the spin-orbit torque using harmonic Hall voltage measurements. *Phys. Rev. B* **89**, 144425 (2014).
- 2 Liu, L., Lee, O. J., Gudmundsen, T. J., Ralph, D. C. & Buhrman, R. A. Current-Induced Switching of Perpendicularly Magnetized Magnetic Layers Using Spin Torque from the Spin Hall Effect. *Phys. Rev. Lett.* **109**, 096602 (2012).
- 3 Yu, J. *et al.* Long spin coherence length and bulk-like spin-orbit torque in ferrimagnetic multilayers. *Nat. Mater.* **18**, 29-34 (2019).
- 4 Garelo, K. *et al.* Symmetry and magnitude of spin-orbit torques in ferromagnetic heterostructures. *Nat. Nanotechnol.* **8**, 587-593 (2013).
- 5 Chen, H. *et al.* Spin-Orbit Torque Switching of Magnetization in Ultra-Thick Ferromagnetic Layers. *Adv. Funct. Mater.* **34**, 2403107 (2024).
- 6 Schulz, T. *et al.* Effective field analysis using the full angular spin-orbit torque magnetometry dependence. *Phys. Rev. B* **95**, 224409 (2017).
- 7 Liu, L. *et al.* Spin-Torque Switching with the Giant Spin Hall Effect of Tantalum. *Science* **336**, 555-558 (2012).
- 8 Xu, J. & Chien, C. L. Voltage-controlled spin-orbit torque switching in W/CoFeB/MgO. *Appl. Phys. Lett.* **118**, 052409 (2021).
- 9 Cierpiał, M. *et al.* Spin-orbit-torque-induced magnetization switching in  $\alpha$ -W-based

- magnetic tunnel junction. *J Phys. D: Appl. Phys.* **59**, 025007 (2026).
- 10 Zhao, T. *et al.* Enhancement of Out-of-Plane Spin–Orbit Torque by Interfacial Modification. *Adv. Mater.* **35**, 2208954 (2023).
- 11 Liu, L. *et al.* Symmetry-dependent field-free switching of perpendicular magnetization. *Nat. Nanotechnol.* **16**, 277-282 (2021).
- 12 Zeng, G. *et al.* Deterministic field-free switching of perpendicular magnetization via out-of-plane spin polarization induced by in-plane asymmetry in Ta heterostructures. *Phys. Rev. Appl.* **24**, 044086 (2025).
- 13 Kao, I. H. *et al.* Deterministic switching of a perpendicularly polarized magnet using unconventional spin–orbit torques in WTe<sub>2</sub>. *Nat. Mater.* **21**, 1029-1034 (2022).
- 14 He, P. *et al.* Nonlinear Planar Hall Effect. *Phys. Rev. Lett.* **123**, 016801 (2019).
- 15 Kozuka, Y. *et al.* Observation of Nonlinear Spin-Charge Conversion in the Thin Film of Nominally Centrosymmetric Dirac Semimetal SrIrO<sub>3</sub> at Room Temperature. *Phys. Rev. Lett.* **126**, 236801 (2021).
